# Supplementary material
Source: Research Square preprint supplement (doi:10.21203/rs.3.rs-9520801/v1)
Supplement: Supplementary file 1 [file 9ef8cc409b202803eda9e596.docx]

Supplementary Materials for

**Protein Structure Group Velocity Dispersion: A Hydration-Driven Inside-out Rupture Principle**

Dedunu S. Senarathne1, H. Peter Lu1*

*Corresponding author. Email: hplu@bgsu.edu

1Department of Chemistry, Center for Photochemical Sciences, Bowling Green State University, Bowling Green, Ohio, 43402, USA.

**S1: PGVD analysis of unliganded EGFR in the presence of 2 mM MgCl2**

**Fig. S1. PGVD analysis in the presence of MgCl2.** Time–averaged velocities for amino acid residues in unliganded EGFR monomer during 700 ps SMD simulation along (**A**) X, (**B**) Y, and (**C**) Z directions. Time-resolved analysis of residue velocities, where velocities of each amino acid residue are shown along (**D**) X and (**E**) Y directions at 100 ps, along (**F**) X and (**G**) Y directions at 200 ps, along (**H**) X and (**I**) Y directions at 300 ps, along (**J**) X and (**K**) Y directions at 400 ps, along (**L**) X and (**M**) Y directions at 500 ps, along (**N**) X and (**O**) Y directions at 600 ps, along (**P**) X and (**Q**) Y directions at 700 ps for unliganded EGFR in the presence of 100 mM NaCl (black) and in the presence of 2 Mm MgCl2 (red).

These results show that variations in ionic strength led to modest but systematic changes in the leading residue index, group size, and both the magnitude and direction of velocity components, indicating that protein structural group velocity dispersion is sensitive to ionic strength.
